# Supplementary material for: Identifying the sources and timing of ancient and medieval atmospheric lead pollution in England using a peat profile from Lindow bog, Manchester
Source: Royal Society of Chemistry journal article supplement (doi:10.1039/b401500b), 2004-01-01
Supplement: b401500b.pdf [file b401500b.pdf]

| Depth (cm) | Lab-number | Sample name    | conv. <sup>14</sup> C Age BP | δ <sup>13</sup> C | cal. Age 1σ          | calibr. Age 2σ    | Age Modelling with a linear depth-age relationship (Calendar years) | error estimation (2s) by PSIMPOLL (years) | 210Pb detectable? |
|------------|------------|----------------|------------------------------|-------------------|----------------------|-------------------|---------------------------------------------------------------------|-------------------------------------------|-------------------|
| -1         |            | LDW0 (Surface) |                              |                   |                      |                   |                                                                     |                                           |                   |
| -3         |            | LDW1           |                              |                   |                      |                   | 2008                                                                | 29                                        | yes               |
| -5         |            | LDW2           |                              |                   |                      |                   | 1970                                                                | 28                                        | yes               |
| -7         |            | LDW3           |                              |                   |                      |                   | 1932                                                                | 28                                        | yes               |
|            |            |                |                              |                   |                      |                   | 1895                                                                | 28                                        | no                |
| -31        | Hd-22750   | LDW 15         | 612±26                       | -26.5             | cal AD 1305-1400     | cal AD1300-1410   | 1440                                                                | 23                                        |                   |
| -47        | Hd-22876   | LDW 23         | 996±46                       | -26.5             | cal AD 990-1160      | cal AD 980-1160   | 1137                                                                | 19                                        |                   |
| -65        | Hd-22877   | LDW 32         | 1196±41                      | -25.4             | cal AD 720-850       | cal AD710-890     | 796                                                                 | 16                                        |                   |
| -75        | Hd-22696   | LDW 37         | 1468±37                      | -26.8             | cal AD 580-640       | cal AD555-655     | 607                                                                 | 15                                        |                   |
| -81        | Hd-22710   | LDW 40         | 1588±24                      | -26.5             | cal AD 486-532       | cal AD 445-540    | 493                                                                 | 14                                        |                   |
| -89        | Hd-22697   | LDW 44         | 1659±41                      | -26.0             | cal AD 335-390       | cal AD260 -420    | 341                                                                 | 14                                        |                   |
| -95        | Hd-22704   | LDW 47         | 1771±37                      | -26.8             | cal AD 219-260       | cal AD170 -190    | 228                                                                 | 13                                        |                   |
| -99        | Hd-22661   | LDW 49         | 1829±23                      | -24.7             | cal AD 128-170       | cal AD80-200      | 152                                                                 | 13                                        |                   |
| -105       | Hd-22654   | LDW 52         | 1997±38                      | -24.8             | cal BC 20- cal AD 55 | cal BC40-cal AD70 | 38                                                                  | 13                                        |                   |
| -119       | Hd-22655   | LDW 59         | 2264±47                      | -25.2             | cal BC320-200        | cal BC390-200     | -227                                                                | 13                                        |                   |
| -215       | B-7425     | LDW 107        | 3670±34                      | -27.1             | cal BC 2140-1970     | cal BC 2150-1940  | -2045                                                               | 30                                        |                   |

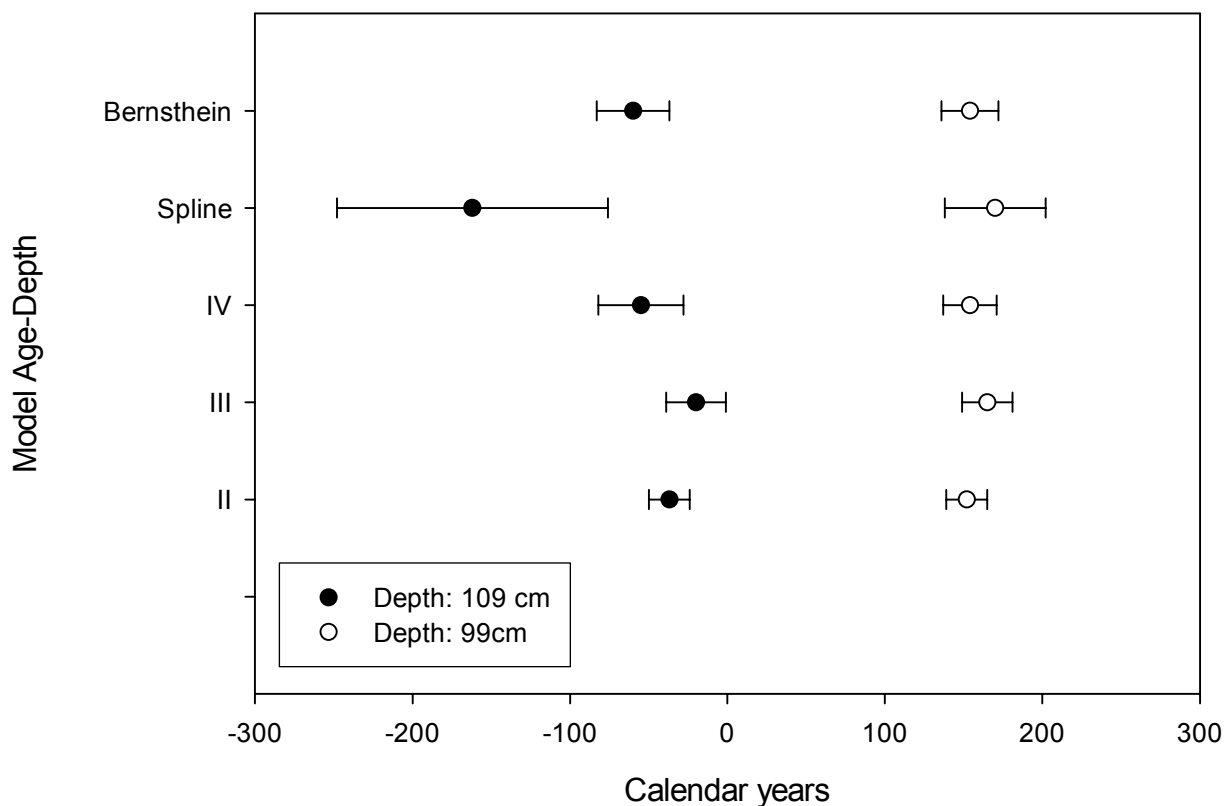

ESI figure 1: comparison between the different age-depth models calculated by PSIMPOLL using the  $^{14}\text{C}$  age dating calibrated by BCAL, II (used in the article), III and IV are the number of terms in polynomial fitting, spline and Bernstein curves are other ways to model the age-depth relationship.<sup>1</sup>

1 K. D. Bennett, *Journal of Quaternary Science*, 2002, **17**, 97.

**ESI TABLE 2: Pb isotopes data in the Lindow peat samples**

Pb concentration

| <i>SAMPLE</i>                | <i>208/206 corr</i> | <i>SD (2s)</i> | <i>207/206 corr</i> | <i>SD (2s)</i> | <i>206/207corr</i> | $\mu\text{g/g}$ |
|------------------------------|---------------------|----------------|---------------------|----------------|--------------------|-----------------|
| <i>TIMS measurements</i>     |                     |                |                     |                |                    |                 |
| <i>LDW1</i>                  | 2,116               | 0,0001         | 0,872               | 0,0000         | 1,146              | 548,2           |
| <i>LDW2</i>                  | 2,110               | 0,0007         | 0,865               | 0,0003         | 1,156              | 460,5           |
| <i>LDW3</i>                  | 2,099               | 0,0001         | 0,857               | 0,0000         | 1,167              | 305,2           |
| <i>LDW4</i>                  | 2,096               | 0,0002         | 0,855               | 0,0001         | 1,170              | 190,3           |
| <i>LDW5</i>                  | 2,095               | 0,0001         | 0,854               | 0,0000         | 1,171              | 77,6            |
| <i>LDW6</i>                  | 2,090               | 0,0001         | 0,852               | 0,0000         | 1,173              | 75,1            |
| <i>LDW7</i>                  | 2,090               | 0,0001         | 0,851               | 0,0001         | 1,175              | 41,9            |
| <i>LDW9</i>                  | 2,088               | 0,0001         | 0,851               | 0,0000         | 1,175              | 45,6            |
| <i>LDW10</i>                 | 2,104               | 0,0010         | 0,856               | 0,0002         | 1,168              | 47,2            |
| <i>LDW11</i>                 | 2,100               | 0,0009         | 0,855               | 0,0005         | 1,169              | 21,2            |
| <i>LDW13</i>                 | 2,095               | 0,0002         | 0,853               | 0,0001         | 1,172              | 22,0            |
| <i>LDW16</i>                 | 2,085               | 0,0003         | 0,848               | 0,0001         | 1,179              | 16,5            |
| <i>LDW19</i>                 | 2,083               | 0,0001         | 0,847               | 0,0000         | 1,180              | 15,0            |
| <i>LDW22</i>                 | 2,086               | 0,0002         | 0,848               | 0,0001         | 1,179              | 19,5            |
| <i>LDW23</i>                 | 2,085               | 0,0004         | 0,848               | 0,0002         | 1,179              | 15,2            |
| <i>LDW27</i>                 | 2,086               | 0,0000         | 0,848               | 0,0000         | 1,179              | 11,3            |
| <i>LDW39</i>                 | 2,087               | 0,0016         | 0,850               | 0,0008         | 1,176              | 0,83            |
| <i>LDW55</i>                 | 2,089               | 0,0007         | 0,854               | 0,0009         | 1,171              | 3,3             |
| <i>LDW55</i>                 | 2,096               | 0,0014         | 0,854               | 0,0005         | 1,171              | 3,3             |
| <i>MC-ICPMS measurements</i> |                     |                |                     |                |                    |                 |
| <i>LDW14</i>                 | 2,087               |                | 0,850               |                | 1,177              | 10,5            |
| <i>LDW15</i>                 | 2,088               |                | 0,850               |                | 1,176              | 10,5            |
| <i>LDW18</i>                 | 2,090               |                | 0,851               |                | 1,175              | 9,5             |
| <i>LDW20</i>                 | 2,086               |                | 0,849               |                | 1,178              | 13,7            |
| <i>LDW21</i>                 | 2,086               |                | 0,849               |                | 1,178              | 12,5            |
| <i>LDW25</i>                 | 2,085               |                | 0,849               |                | 1,179              | 11,7            |
| <i>LDW29</i>                 | 2,086               |                | 0,849               |                | 1,178              | 5,9             |
| <i>LDW30</i>                 | 2,086               |                | 0,849               |                | 1,178              | 4,7             |
| <i>LDW40</i>                 | 2,084               |                | 0,846               |                | 1,181              | 1,1             |
| <i>LDW48</i>                 | 2,086               |                | 0,849               |                | 1,178              | 2,5             |
| <i>LDW49</i>                 | 2,087               |                | 0,849               |                | 1,177              | 4,1             |
| <i>LDW52</i>                 | 2,088               |                | 0,850               |                | 1,176              | 4,8             |
| <i>LDW53</i>                 | 2,087               |                | 0,849               |                | 1,177              | 3,9             |
| <i>LDW55</i>                 | 2,089               |                | 0,851               |                | 1,175              | 3,3             |
| <i>LDW57</i>                 | 2,088               |                | 0,850               |                | 1,176              | 2,6             |
| <i>LDW58</i>                 | 2,090               |                | 0,850               |                | 1,177              | 2,0             |
| <b>Reproducibility (ppm)</b> |                     | 263            |                     | 222            |                    |                 |
| <i>SF-ICPMS measurements</i> |                     |                |                     |                |                    |                 |
| LDW3                         | 2,097               | 0,0013         | 0,856               | 0,0006         | 1,168              | 305,2           |
| LDW6                         | 2,091               | 0,0017         | 0,852               | 0,0007         | 1,173              | 75,1            |
| LDW23                        | 2,086               | 0,0010         | 0,849               | 0,0004         | 1,178              | 15,2            |
| LDW31                        | 2,088               | 0,0014         | 0,848               | 0,0007         | 1,179              | 4,8             |
| LDW36                        | 2,084               | 0,0012         | 0,841               | 0,0006         | 1,189              | 0,69            |
| LDW44                        | 2,090               | 0,0012         | 0,847               | 0,0008         | 1,181              | 0,84            |
| LDW45                        | 2,091               | 0,0050         | 0,850               | 0,0017         | 1,177              | 0,89            |
| LDW46                        | 2,088               | 0,0036         | 0,848               | 0,0018         | 1,179              | 1,4             |
| LDW55                        | 2,091               | 0,0033         | 0,851               | 0,0004         | 1,175              | 3,3             |
| LDW59                        | 2,087               | 0,0025         | 0,848               | 0,0006         | 1,180              | 0,61            |
| LDW75                        | 2,091               | 0,0024         | 0,846               | 0,0004         | 1,182              | 0,56            |
| LDW90                        | 2,080               | 0,0027         | 0,846               | 0,0022         | 1,183              | 0,23            |
| LDW95                        | 2,084               | 0,0019         | 0,847               | 0,0011         | 1,181              | 0,16            |
| LDW100                       | 2,090               | 0,0031         | 0,851               | 0,0022         | 1,175              | 0,16            |
| LDW105                       | 2,105               | 0,0022         | 0,852               | 0,0011         | 1,174              | 0,24            |

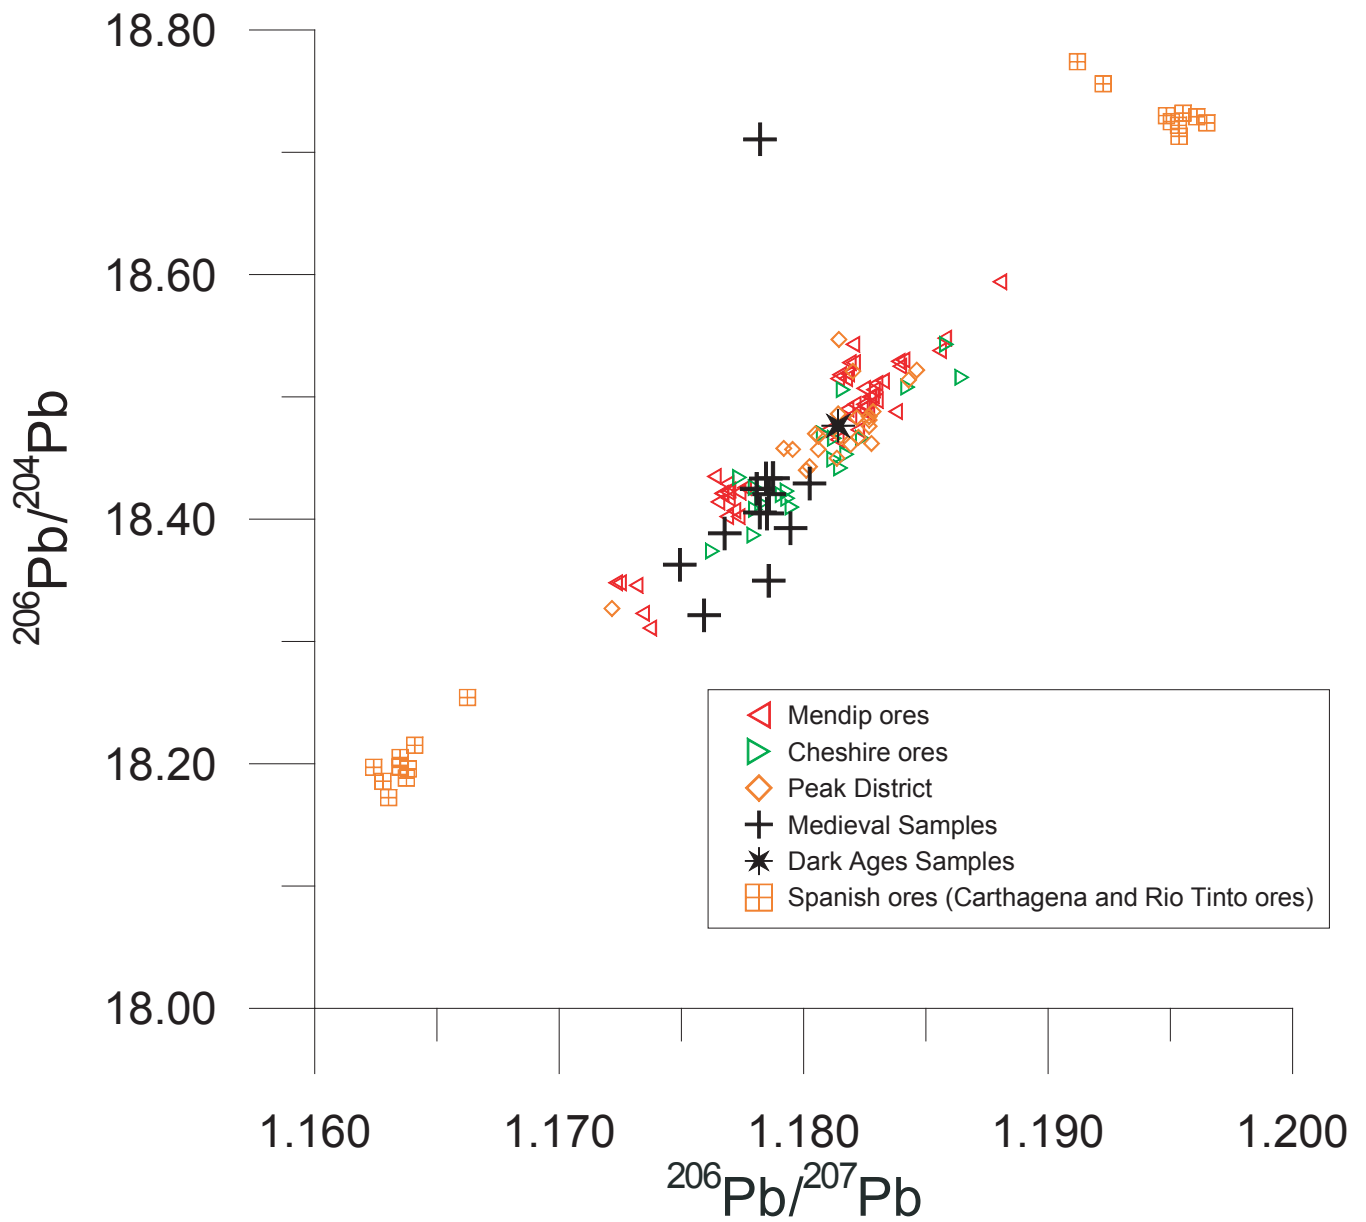

ESI figure 2:  $^{206}\text{Pb}/^{207}\text{Pb}$  vs.  $^{206}\text{Pb}/^{204}\text{Pb}$  diagram for samples dated from the Medieval Period. This diagram illustrates that  $^{204}\text{Pb}$  does not help to further distinguish the sources of Pb ores to the bog.
